# Supplementary material
Source: HighWire-hosted journal article supplement (https://www.jpn.ca/highwire/filestream/90032/field_highwire_adjunct_files/0/210064-1-at.pdf)
Supplement: 210064-1-at.pdf [file 210064-1-at.pdf]

Copyright © 2021 The Author(s) or their employer(s).

To receive this resource in an accessible format, please contact us at [cmajgroup@cmaj.ca](mailto:cmajgroup@cmaj.ca).

Online appendices are unedited and posted as supplied by the authors.

# Appendix 1

**Table S1. Clinical sample description for the 4 groups emerging from the factors social anxiety disorder and early-life adversity.**

|                                    | Ce | CE | Se  | SE       |
|------------------------------------|----|----|-----|----------|
| Total participants                 | 34 | 24 | 21  | 21       |
| Diagnosis                          |    |    |     |          |
| Current depression (mild-moderate) | 0  | 0  | 2   | 2        |
| Dysthymia                          | 0  | 0  | 2   | 4        |
| Alcohol abuse                      | 1  | 1  | 0   | 2 (past) |
| Panic disorder                     | 0  | 0  | 4   | 4        |
| Agoraphobia                        | 0  | 0  | 4   | 2        |
| Specific phobia                    | 2  | 2  | 5   | 4        |
| Obsessive–compulsive disorder      | 0  | 0  | 0   | 2        |
| Generalized anxiety disorder       | 0  | 0  | 3   | 1        |
| Post-traumatic stress disorder     | 0  | 0  | 0   | 0        |
| Medication                         |    |    |     |          |
| Benzodiazepines                    | 0  | 0  | 2*  | 0        |
| Antidepressants                    | 0  | 0  | 2** | 2***     |

Ce: control participants with low levels of early-life adversity, CE: control participants with high levels of early-life adversity, Se: participants with social anxiety disorder and low levels of early-life adversity, SE: participants with social anxiety disorder and high levels of early-life adversity

\* infrequent use as needed

\*\* Escitalopram, Opipramol

\*\*\* Escitalopram, Citalopram

Copyright © 2021 The Author(s) or their employer(s).

To receive this resource in an accessible format, please contact us at [cmajgroup@cmaj.ca](mailto:cmajgroup@cmaj.ca).

Online appendices are unedited and posted as supplied by the authors.

## Stimuli and task design

Word stimuli originated from previous studies and were matched for numbers of letters and syllables, familiarity, and frequency in spoken and written language using the COSMAS II database (<http://www.ids-mannheim.de/cosmas2>)<sup>1-7</sup>. The experimental design was closely adapted from Dresler et al. (2012)<sup>1</sup>. Stimulus presentation was randomized and stimulus events were interspersed with 10% null events. For each trial, participants were instructed to indicate as fast and accurately as possible the number of word repetitions with an MRI compatible response pad using their right index, middle or ring finger. The order of the assigned buttons was balanced between the participants, i.e., whether the index or ring finger was assigned to 2 or 4 word repetitions. The mean inter-trial-interval was 6 s (range: 4.5 s – 7.5 s) jittered in steps of 375 ms (= 1/4 TR) relative to stimulus onset. For each trial, a white fixation cross on gray background was presented first, followed by a stimulus presentation for 500 ms.

## Image acquisition – complete parameters

MRI data were acquired using a 3 Tesla scanner (PRISMA, Siemens, Erlangen, Germany). Structural MP-RAGE T<sub>1</sub>-weighted images were recorded using the following parameters: 208 slices, repetition time (TR) of 2400 ms, echo time (TE) of 2.22 ms, voxel size: 0.8 × 0.8 × 0.8 mm<sup>3</sup>, field of view (FoV) of 256 × 256 mm<sup>2</sup>, flip angle 8°. For functional imaging, multiband echo-planar imaging (EPI) sequences were used with the following parameters: 72 slices, 2 mm thickness, TR = 1500 ms, TE = 34 ms, multiband acceleration factor: 3, voxel size: 2 × 2 × 2 mm<sup>3</sup>, FoV = 192 × 192 mm<sup>2</sup>, flip angle 70°, 850 volumes. A field map was acquired with the following parameters: 36 slices, 3 mm slice thickness, TR = 400 ms, TE[1] = 5.19, TE[2] = 7.65 ms, flip angle 60°.

Copyright © 2021 The Author(s) or their employer(s).

To receive this resource in an accessible format, please contact us at [cmajgroup@cmaj.ca](mailto:cmajgroup@cmaj.ca).

Online appendices are unedited and posted as supplied by the authors.

## Emotional interference

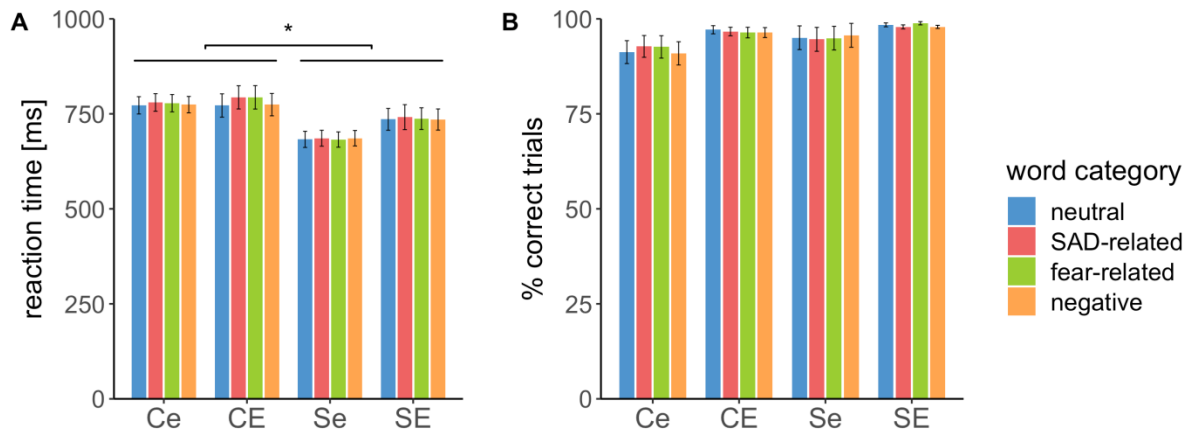

**Figure S1. Emotional interference.** A: Mean reaction times  $\pm$  standard error for each group and each word category. B: Mean number of correctly answered trials  $\pm$  standard error for each group and each word category. Ce: control participants with low levels of early-life adversity, CE: control participants with high levels of early-life adversity, Se: participants with social anxiety disorder and low levels of early-life adversity, SE: participants with social anxiety disorder and high levels of early-life adversity, SAD: social anxiety disorder, asterisk mark  $p < 0.05$ .

## Functional MRI data

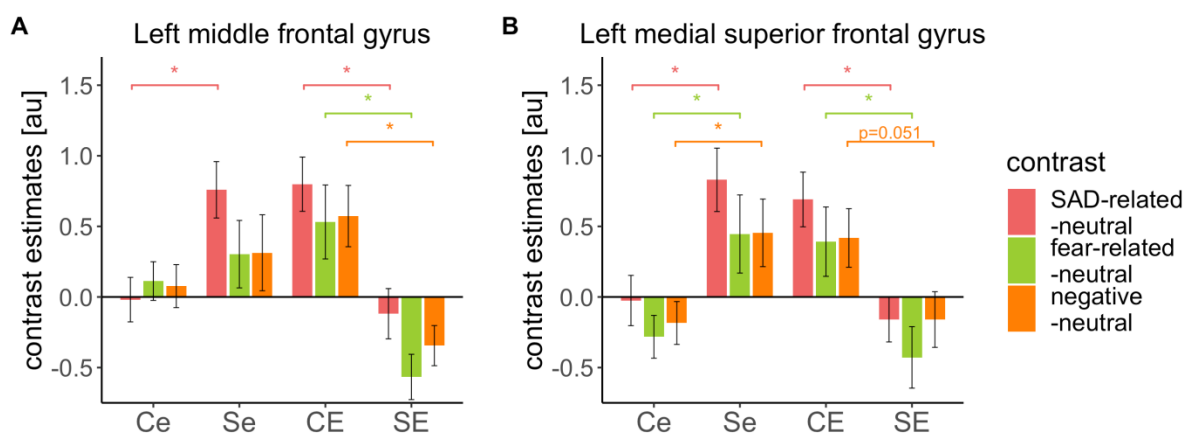

**Figure S2. Cerebral correlates of the contrast 'SAD-related versus neutral words', 'fear-related versus neutral words' and 'negative versus neutral words' in the identified clusters.** Mean contrast estimates for each group extracted from the significant clusters identified in the region-of-interest analysis. Clusters were located within the left middle frontal gyrus (A) and the left medial superior frontal gyrus (B). Ce: control participants with low levels

Appendix 1 to Weigand A, Munk MHJ, Drohm S, et al. Neural correlates of attentional control in social anxiety disorder: the impact of early-life adversity and DNA methylation. *J Psychiatry Neurosci* 2021. doi: 10.1503/jpn.210064

Copyright © 2021 The Author(s) or their employer(s).

To receive this resource in an accessible format, please contact us at [cmajgroup@cmaj.ca](mailto:cmajgroup@cmaj.ca).

Online appendices are unedited and posted as supplied by the authors.

of early-life adversity, CE: control participants with high levels of early-life adversity, Se: participants with social anxiety disorder and low levels of early-life adversity, SE: participants with social anxiety disorder and high levels of early-life adversity. Error bars depict standard errors of the mean, asterisks mark  $p < 0.05$ .

Copyright © 2021 The Author(s) or their employer(s).

To receive this resource in an accessible format, please contact us at [cmajgroup@cmaj.ca](mailto:cmajgroup@cmaj.ca).

Online appendices are unedited and posted as supplied by the authors.

## **Functional MRI data: controlling for depression, general anxiety and alcohol abuse**

To make sure that the observed interaction effect between social anxiety disorder and early-life adversity in the MFG and mSFG is not driven by differences in depression (as indicated by Beck Depression Inventory II scores), general anxiety (as indicated by State-Trait Anxiety Inventory state and trait scores) or alcohol abuse, we included the corresponding values as covariates in our model. Post-hoc tests showed that the interaction effect of social anxiety disorder and early-life adversity remained significant for both clusters when including the Beck Depression Inventory II score (MFG:  $F(1,93) = 20.25$ ,  $p < 0.001$ , mSFG:  $F(1,93) = 18.22$ ,  $p < 0.001$ ), the State-Trait Anxiety Inventory state and trait scores (MFG:  $F(1,92) = 20.38$ ,  $p < 0.001$ , mSFG:  $F(1,92) = 17.93$ ,  $p < 0.001$ ) or alcohol abuse as covariates (MFG:  $F(1,93) = 20.77$ ,  $p < 0.001$ , mSFG:  $F(1,93) = 18.70$ ,  $p < 0.001$ ).

Copyright © 2021 The Author(s) or their employer(s).

To receive this resource in an accessible format, please contact us at [cmajgroup@cmaj.ca](mailto:cmajgroup@cmaj.ca).

Online appendices are unedited and posted as supplied by the authors.

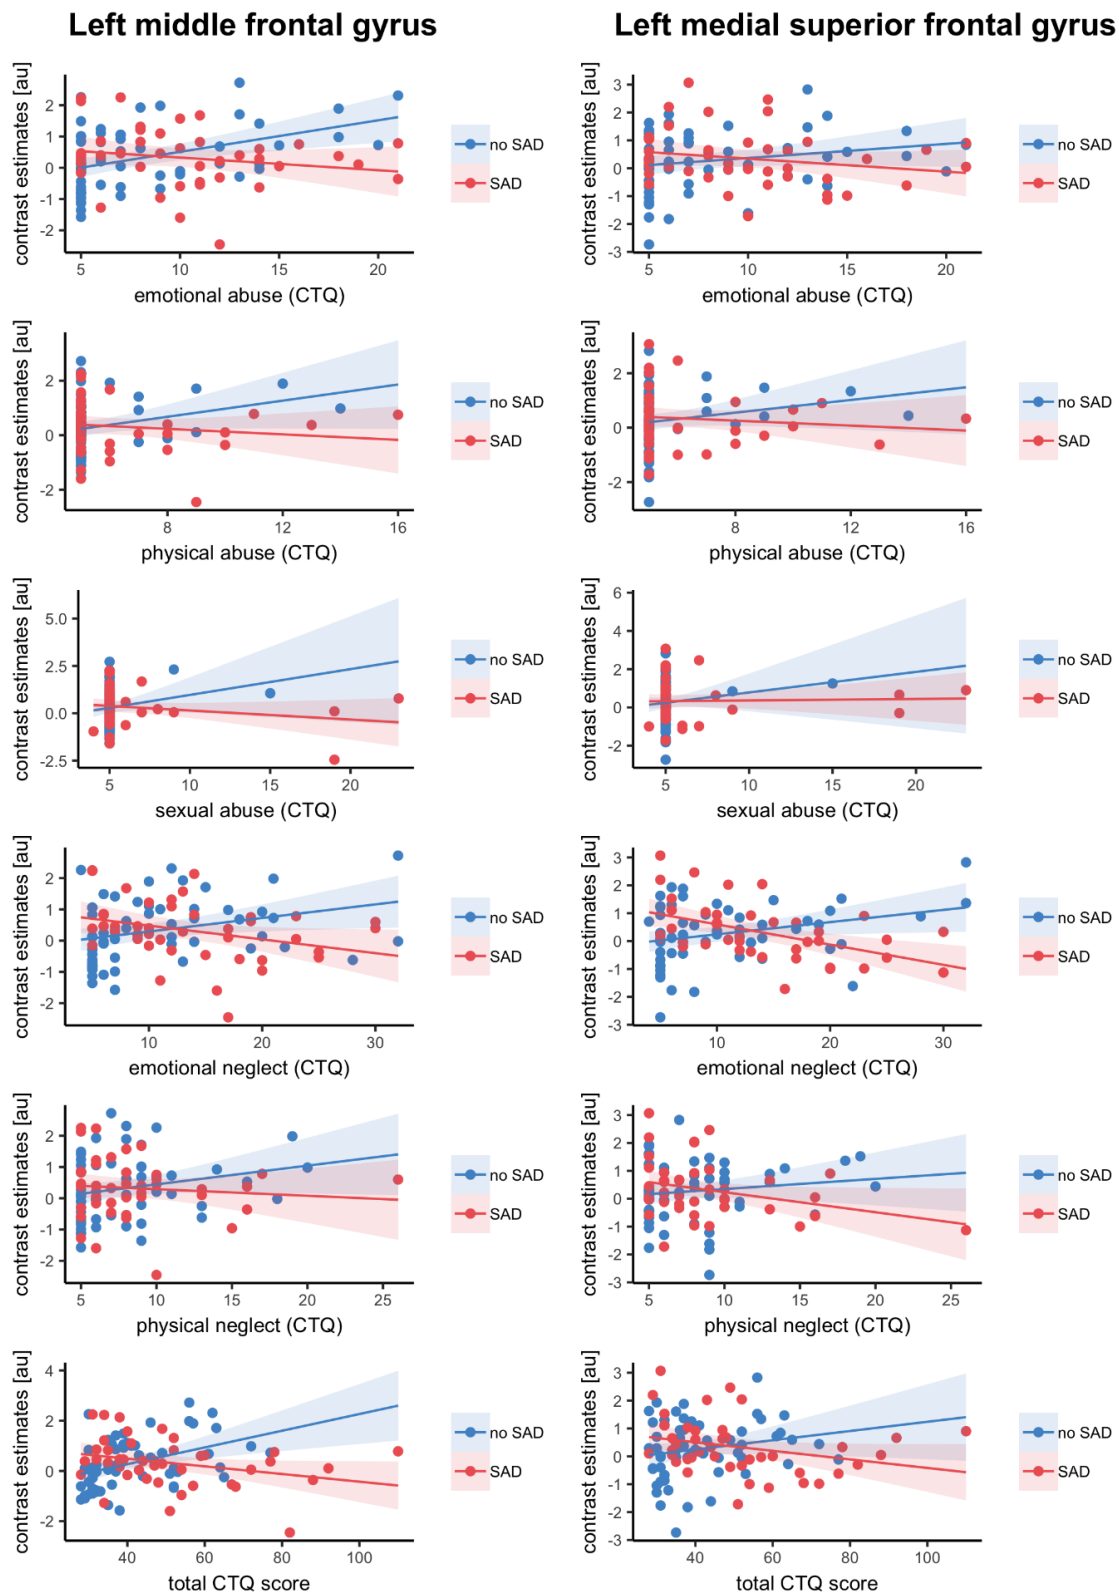

**Figure S3. Correlation of mean contrast estimates ('social anxiety disorder-related versus neutral words') extracted from the identified clusters and Childhood Trauma**

Appendix 1 to Weigand A, Munk MHJ, Drohm S, et al. Neural correlates of attentional control in social anxiety disorder: the impact of early-life adversity and DNA methylation. *J Psychiatry Neurosci* 2021. doi: 10.1503/jpn.210064

Copyright © 2021 The Author(s) or their employer(s).

To receive this resource in an accessible format, please contact us at [cmajgroup@cmaj.ca](mailto:cmajgroup@cmaj.ca).

Online appendices are unedited and posted as supplied by the authors.

**Questionnaire scales.** Separate regression lines with 0.95 confidence intervals for control individuals and participants with social anxiety disorder. CTQ: Childhood Trauma Questionnaire, SAD: social anxiety disorder.

Copyright © 2021 The Author(s) or their employer(s).

To receive this resource in an accessible format, please contact us at [cmajgroup@cmaj.ca](mailto:cmajgroup@cmaj.ca).

Online appendices are unedited and posted as supplied by the authors.

**Table S2. DNA methylation levels at the 74 CpG sites located within the *NR3C1* gene.**

| CpG site   | Mean   | SD    |
|------------|--------|-------|
| cg00294552 | 94.75% | 0.82% |
| cg00407401 | 96.65% | 0.60% |
| cg01294526 | 94.44% | 1.20% |
| cg01751279 | 91.78% | 1.58% |
| cg01967637 | 5.48%  | 0.85% |
| cg03746860 | 97.05% | 0.51% |
| cg03857453 | 79.71% | 2.05% |
| cg03906910 | 20.75% | 1.88% |
| cg04457787 | 97.32% | 0.49% |
| cg05483455 | 98.60% | 0.21% |
| cg05900547 | 93.73% | 1.08% |
| cg06613263 | 92.84% | 1.40% |
| cg06952416 | 7.75%  | 0.71% |
| cg06968181 | 4.99%  | 0.41% |
| cg07515400 | 2.28%  | 0.63% |
| cg07528216 | 98.41% | 0.21% |
| cg07589972 | 96.99% | 0.41% |
| cg07715663 | 97.56% | 0.36% |
| cg07733851 | 32.85% | 2.39% |
| cg07742588 | 90.55% | 2.10% |
| cg08423118 | 84.72% | 6.09% |
| cg08695103 | 38.32% | 3.88% |
| cg08818984 | 1.77%  | 0.21% |
| cg08845721 | 96.84% | 0.76% |
| cg12466613 | 98.33% | 0.23% |
| cg12741214 | 98.07% | 0.37% |
| cg12888360 | 16.32% | 2.97% |
| cg12969488 | 74.23% | 1.72% |
| cg13514002 | 96.92% | 0.57% |
| cg13648501 | 2.72%  | 0.34% |
| cg13764763 | 92.87% | 2.08% |
| cg14438279 | 89.47% | 2.52% |
| cg14621978 | 97.25% | 0.36% |
| cg14939152 | 2.20%  | 0.13% |
| cg15115787 | 25.16% | 1.69% |
| cg15910486 | 6.26%  | 0.69% |
| cg16219186 | 96.09% | 0.69% |
| cg16224829 | 87.32% | 1.92% |



Copyright © 2021 The Author(s) or their employer(s).

To receive this resource in an accessible format, please contact us at [cmajgroup@cmaj.ca](mailto:cmajgroup@cmaj.ca).

Online appendices are unedited and posted as supplied by the authors.

|            |        |       |
|------------|--------|-------|
| cg16535116 | 91.34% | 1.47% |
| cg16586394 | 96.96% | 0.51% |
| cg16594263 | 97.96% | 0.37% |
| cg17342132 | 88.72% | 1.99% |
| cg17349736 | 95.65% | 0.69% |
| cg18146873 | 2.21%  | 0.34% |
| cg18484679 | 94.39% | 0.90% |
| cg18718518 | 59.88% | 2.18% |
| cg18849621 | 2.27%  | 0.30% |
| cg18998365 | 56.10% | 3.18% |
| cg19135245 | 3.88%  | 0.35% |
| cg19176661 | 97.19% | 0.41% |
| cg19432243 | 87.64% | 2.34% |
| cg19457823 | 94.89% | 0.98% |
| cg19645279 | 61.20% | 2.43% |
| cg19820298 | 89.19% | 2.15% |
| cg20598211 | 97.74% | 0.46% |
| cg20728768 | 28.95% | 2.13% |
| cg20753294 | 5.91%  | 0.46% |
| cg21209684 | 2.23%  | 0.15% |
| cg21979215 | 90.03% | 1.97% |
| cg22233604 | 80.95% | 1.82% |
| cg22402730 | 1.57%  | 0.19% |
| cg23273257 | 98.86% | 0.16% |
| cg23430507 | 72.56% | 1.51% |
| cg23776787 | 3.26%  | 0.45% |
| cg24052866 | 71.86% | 1.78% |
| cg24801588 | 96.49% | 0.48% |
| cg25535999 | 96.22% | 0.53% |
| cg25579735 | 97.83% | 0.44% |
| cg25708981 | 92.32% | 1.59% |
| cg26081259 | 98.19% | 0.33% |
| cg26464411 | 5.83%  | 0.78% |
| cg27107893 | 90.41% | 6.10% |
| cg27122725 | 6.32%  | 0.65% |
| cg27345592 | 98.39% | 0.24% |

SD: standard deviation

Copyright © 2021 The Author(s) or their employer(s).

To receive this resource in an accessible format, please contact us at [cmajgroup@cmaj.ca](mailto:cmajgroup@cmaj.ca).

Online appendices are unedited and posted as supplied by the authors.

## References

1. Dresler T, Attar CH, Spitzer C, et al. Neural correlates of the emotional Stroop task in panic disorder patients: an event-related fMRI study. *Journal of psychiatric research*. 2012;46(12):1627-1634.
2. Price R, Eldreth D, Mohlman J. Deficient prefrontal attentional control in late-life generalized anxiety disorder: an fMRI investigation. *Translational psychiatry*. 2011;1(10):e46.
3. Becker ES, Rinck M, Margraf J, Roth WT. The emotional Stroop effect in anxiety disorders: General emotionality or disorder specificity? *Journal of anxiety disorders*. 2001;15(3):147-159.
4. Asmundson GJ, Sandler LS, Wilson KG, Walker JR. Selective attention toward physical threat in patients with panic disorder. *Journal of Anxiety Disorders*. 1992;6(4):295-303.
5. Asmundson GJ, Stein MB. Selective processing of social threat in patients with generalized social phobia: Evaluation using a dot-probe paradigm. *Journal of Anxiety Disorders*. 1994;8(2):107-117.
6. Chen J, Wang Z, Wu Y, et al. Differential attentional bias in generalized anxiety disorder and panic disorder. *Neuropsychiatric disease and treatment*. 2013;9:73.
7. Van den Heuvel OA, Veltman DJ, Groenewegen HJ, et al. Disorder-specific neuroanatomical correlates of attentional bias in obsessive-compulsive disorder, panic disorder, and hypochondriasis. *Archives of general psychiatry*. 2005;62(8):922-933.
